# Supplementary material
Source: publisher figshare collection journal article supplement (https://frontiersin.figshare.com/ndownloader/files/14634836)
Supplement: Supplementary file [file 14634836]

## Supplementary Material

### *In silico* and Genetic Analyses of Cyclic Lipopeptide Synthetic Gene Clusters in *Pseudomonas* sp. 11K1

Hui Zhao<sup>1</sup>, Yan-Ping Liu<sup>1,2</sup>, Li-Qun Zhang<sup>1\*</sup>

\*Corresponding author, e-mail address: zhanglq@cau.edu.cn

#### Supplementary Figure

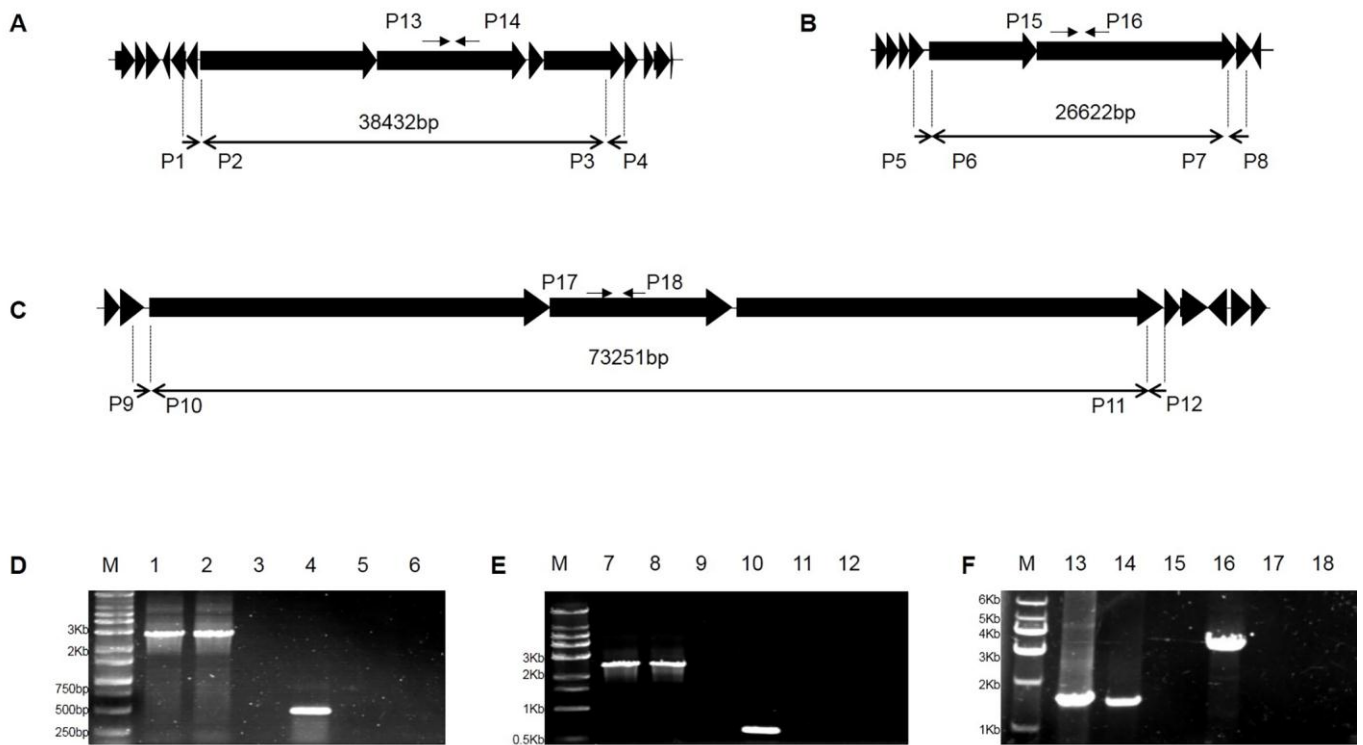

**FIGURE S1** | (A) Construction of brasmycin gene cluster deletion mutant  $\Delta$ bam, (B) brasamide gene cluster deletion mutant  $\Delta$ baa, and (C) braspeptin gene cluster deletion mutant  $\Delta$ bap. Two rounds of PCR were used to confirm the mutants. (D) Agarose gel electrophoresis. Lane 1, plasmid p2P24- $\Delta$ bam; lane 2, mutant  $\Delta$ bam; lane 3, CK1; lane 4, wild-type (WT) 11K1; lane 5, mutant  $\Delta$ bam; lane 6, CK2. First-round PCR employed primers P1 and P4 for brasmycin mutant detection (lanes 1–3). Second-round PCR employed primers P13 and P14 for brasmycin mutant detection (lanes 4–6). (E) Lane 7, plasmid p2P24- $\Delta$ baa; lane 8, mutant  $\Delta$ baa; lane 9, CK1; lane 10, WT 11K1; lane 11, mutant  $\Delta$ baa; lane 12, CK2. First-round PCR employed primers P5 and P8 for brasamide mutant detection (lanes 7–9). Second-round PCR employed primers P15 and P16 for brasamide mutant detection (lanes 10–12). (F) Lane 13, plasmid p2P24- $\Delta$ bap; lane 14, mutant  $\Delta$ bap; lane 15, CK1; lane 16, WT 11K1; lane 16, mutant  $\Delta$ bap; lane 18, CK2. First-round PCR employed primers P9 and P10 for braspeptin mutant detection (lanes 13–15). Second-round PCR employed primers P17 and P18 for braspeptin mutant detection. M = markers showing the size of DNA standards.
